# Supplementary material for: Syntheses, structures and properties of two new members of the pentaborate family: NaKB5O8(OH)·H2O and KB5O8·2H2O
Source: Royal Society of Chemistry journal article supplement (doi:10.1039/d4dt02672a), 2024-01-01
Supplement: d4dt02672a1.pdf [file d4dt02672a1.pdf]

## Electronic Supplementary Information

### Syntheses, structures and properties of two new members of the pentaborate family: $\text{NaKB}_5\text{O}_8(\text{OH})\cdot\text{H}_2\text{O}$ and $\text{KB}_5\text{O}_8\cdot 2\text{H}_2\text{O}$

Xiaojing Li,<sup>‡a,b</sup> Luyong Zhang,<sup>‡a,b</sup> Fuming Li,<sup>a,b</sup> Zhihua Yang,<sup>a,b</sup> Xueling Hou <sup>\*a,b</sup> and

Fangfang Zhang <sup>\*a,b</sup>

<sup>a</sup>Research Center for Crystal Materials; State Key Laboratory of Functional Materials and Devices for Special Environmental Conditions; Xinjiang Key Laboratory of Functional Crystal Materials; Xinjiang Technical Institute of Physics and Chemistry, Chinese Academy of Sciences, 40-1 South Beijing Road, Urumqi 830011, China.

<sup>b</sup>Center of Materials Science and Optoelectronics Engineering, University of Chinese Academy of Sciences, Beijing 100049, China.

<sup>‡</sup>These authors contributed equally to this work.

\*Corresponding authors, E-mails: xlhou@ms.xjb.ac.cn, ffzhang@ms.xjb.ac.cn

**Table S1.** Crystal data and structure refinement for I and II.

|                                                                                                                      | I                                                                | II                                                                   |
|----------------------------------------------------------------------------------------------------------------------|------------------------------------------------------------------|----------------------------------------------------------------------|
| Empirical formula                                                                                                    | NaKB <sub>5</sub> O <sub>8</sub> (OH)·H <sub>2</sub> O           | KB <sub>5</sub> O <sub>8</sub> ·2H <sub>2</sub> O                    |
| Formula weight                                                                                                       | 279.16                                                           | 257.18                                                               |
| Crystal system                                                                                                       | Triclinic                                                        | Orthorhombic                                                         |
| Space group                                                                                                          | <i>P</i> Error!                                                  | <i>Fddd</i>                                                          |
| <i>a</i> (Å)                                                                                                         | 6.6157(5)                                                        | 11.883(3)                                                            |
| <i>b</i> (Å)                                                                                                         | 6.6221(5)                                                        | 13.115(3)                                                            |
| <i>c</i> (Å)                                                                                                         | 11.1837(8)                                                       | 21.624(5)                                                            |
| $\alpha$ (°)                                                                                                         | 78.713(3)                                                        | 90                                                                   |
| $\beta$ (°)                                                                                                          | 76.654(2)                                                        | 90                                                                   |
| $\gamma$ (°)                                                                                                         | 60.592(2)                                                        | 90                                                                   |
| Volume (Å <sup>3</sup> )                                                                                             | 413.33(5)                                                        | 3370.1(14)                                                           |
| Z, Calculated density (g·cm <sup>-3</sup> )                                                                          | 2, 2.243                                                         | 16, 2.028                                                            |
| Absorption coefficient (mm <sup>-1</sup> )                                                                           | 0.738                                                            | 0.670                                                                |
| <i>F</i> (000)                                                                                                       | 276                                                              | 2048                                                                 |
| Theta range for data collection (°)                                                                                  | 1.880 to 27.514                                                  | 2.497 to 27.472                                                      |
| Limiting indices                                                                                                     | $-8 \leq h \leq 8$<br>$-8 \leq k \leq 8$<br>$-14 \leq l \leq 14$ | $-15 \leq h \leq 12$<br>$-15 \leq k \leq 16$<br>$-28 \leq l \leq 27$ |
| Reflections collected / unique                                                                                       | 6945 / 1899 [ <i>R</i> (int) = 0.0560]                           | 4890 / 969 [ <i>R</i> (int) = 0.0492]                                |
| Completeness (%)                                                                                                     | 99.7                                                             | 99.7                                                                 |
| Data / restraints / parameters                                                                                       | 1899 / 0 / 154                                                   | 969 / 0 / 74                                                         |
| Goodness-of-fit on <i>F</i> <sup>2</sup>                                                                             | 1.081                                                            | 1.074                                                                |
| Final <i>R</i> indices [ <i>F</i> <sub>o</sub> <sup>2</sup> > 2σ( <i>F</i> <sub>o</sub> <sup>2</sup> )] <sup>a</sup> | <i>R</i> <sub>1</sub> = 0.0348, <i>wR</i> <sub>2</sub> = 0.0756  | <i>R</i> <sub>1</sub> = 0.0423, <i>wR</i> <sub>2</sub> = 0.1018      |
| <i>R</i> indices (all data) <sup>a</sup>                                                                             | <i>R</i> <sub>1</sub> = 0.0442, <i>wR</i> <sub>2</sub> = 0.0857  | <i>R</i> <sub>1</sub> = 0.0567, <i>wR</i> <sub>2</sub> = 0.1099      |
| Largest diff. peak and hole (e·Å <sup>-3</sup> )                                                                     | 0.360 and -0.371                                                 | 0.419 and -0.445                                                     |

<sup>a</sup> $R_1 = \sum ||F_o| - |F_c|| / \sum |F_o|$  and  $wR_2 = [\sum w(F_o^2 - F_c^2)^2 / \sum wF_o^4]^{1/2}$  for  $F_o^2 > 2\sigma(F_o^2)$

**Table S2.** Atomic coordinates ( $\times 10^4$ ), equivalent isotropic displacement parameters ( $\text{\AA}^2 \times 10^3$ ), Wyckoff positions, and BVS calculations for I.  $U_{\text{eq}}$  is defined as one third of the trace of the orthogonalized  $U_{ij}$  tensor.

| Atoms | Wyck. | x        | y        | z       | $U_{\text{eq}}$ | BVS <sup>a</sup> |
|-------|-------|----------|----------|---------|-----------------|------------------|
| K(1)  | 2i    | 6594(1)  | 1830(1)  | 788(1)  | 20(1)           | 1.23             |
| Na(1) | 2i    | 3058(2)  | 11037(2) | 3977(1) | 24(1)           | 1.17             |
| B(1)  | 2i    | 2012(4)  | 6651(4)  | 4085(2) | 16(1)           | 3.05             |
| B(2)  | 2i    | 1439(4)  | 5467(4)  | 2289(2) | 13(1)           | 3.06             |
| B(3)  | 2i    | 3162(4)  | 8126(4)  | 1971(2) | 13(1)           | 3.04             |
| B(4)  | 2i    | 7580(4)  | 6513(4)  | 1673(2) | 14(1)           | 3.06             |
| B(5)  | 2i    | 10676(4) | 2520(4)  | 1645(2) | 13(1)           | 3.06             |
| O(1)  | 2i    | 6899(3)  | 10342(3) | 3866(2) | 28(1)           | 0.44             |
| O(2)  | 2i    | 1750(3)  | 6627(3)  | 5358(2) | 26(1)           | 1.02             |
| O(3)  | 2i    | 1411(3)  | 5267(3)  | 3652(1) | 18(1)           | 1.91             |
| O(4)  | 2i    | 3104(2)  | 6195(2)  | 1610(1) | 12(1)           | 2.06             |
| O(5)  | 2i    | 2777(3)  | 8084(3)  | 3354(1) | 18(1)           | 2.04             |
| O(6)  | 2i    | 5408(2)  | 8155(3)  | 1491(1) | 16(1)           | 2.00             |
| O(7)  | 2i    | 8992(3)  | 7104(3)  | 2074(2) | 18(1)           | 1.87             |
| O(8)  | 2i    | 8446(3)  | 4230(3)  | 1426(2) | 21(1)           | 2.11             |
| O(9)  | 2i    | 12110(2) | 3097(2)  | 2028(1) | 14(1)           | 2.20             |
| O(10) | 2i    | 11248(3) | 330(3)   | 1486(1) | 15(1)           | 2.03             |

<sup>a</sup>BVS are calculated by using the bond-valence model ( $S_i = \exp[(R_o - R_i)/B]$ , where  $R_o$  is an empirical constant,  $R_i$  is the length of bond  $i$  (in angstroms), and  $B = 0.37$ ). The  $R_o$  parameters used are 1.371 for B-O, 2.132 for K-O, and 1.803 for Na-O, respectively.

**Table S3.** Atomic coordinates ( $\times 10^4$ ), equivalent isotropic displacement parameters ( $\text{\AA}^2 \times 10^3$ ), Wyckoff positions, and BVS calculations for II.  $U_{\text{eq}}$  is defined as one third of the trace of the orthogonalized  $U_{ij}$  tensor.

| Atoms | Wyck. | x       | y        | z       | $U_{\text{eq}}$ | BVS <sup>a</sup> |
|-------|-------|---------|----------|---------|-----------------|------------------|
| K(1)  | 16e   | 3233(1) | 1250     | 1250    | 27(1)           | 1.08             |
| B(1)  | 32h   | 3820(2) | 307(2)   | 2652(1) | 13(1)           | 3.03             |
| B(2)  | 32h   | 36(2)   | -1597(2) | 478(1)  | 14(1)           | 3.07             |
| B(3)  | 16f   | 1250    | -752(3)  | 1250    | 14(1)           | 3.09             |
| O(1)  | 32h   | 3035(1) | 1055(1)  | 2506(1) | 16(1)           | 2.12             |
| O(2)  | 32h   | 4235(1) | -179(1)  | 2136(1) | 16(1)           | 2.11             |
| O(3)  | 32h   | 1614(1) | -104(1)  | 735(1)  | 16(1)           | 2.02             |
| O(4)  | 32h   | 308(1)  | -1412(1) | 1071(1) | 16(1)           | 1.85             |
| O(5)  | 32h   | 5309(2) | 1982(2)  | 1932(1) | 54(1)           | 0.088            |

<sup>a</sup>BVS are calculated by using the bond-valence model ( $S_i = \exp[(R_o - R_i)/B]$ , where  $R_o$  is an empirical constant,  $R_i$  is the length of bond  $i$  (in angstroms), and  $B = 0.37$ ). The  $R_o$  parameters used are 1.371 for B-O and 2.132 for K-O, respectively.

**Table S4.** Hydrogen coordinates ( $\times 10^4$ ), isotropic displacement parameters ( $\text{\AA}^2 \times 10^3$ ), and Wyckoff positions for **I** and **II**.  $U_{\text{eq}}$  is defined as one third of the trace of the orthogonalized  $U_{ij}$  tensor.

| Compounds | Atoms | Wyck. | x    | y     | z    | $U_{\text{eq}}$ |
|-----------|-------|-------|------|-------|------|-----------------|
| <b>I</b>  | H(1)  | 2i    | 1326 | 5436  | 5736 | 39              |
|           | H(2)  | 2i    | 7728 | 9377  | 3219 | 42              |
|           | H(3)  | 2i    | 7415 | 11457 | 3810 | 42              |
| <b>II</b> | H(1)  | 32h   | 5502 | 2628  | 1812 | 81              |
|           | H(2)  | 32h   | 5491 | 1763  | 2324 | 81              |

**Table S5.** Selected bond lengths (Å) and angles (°) for I.

|                     |            |                     |            |
|---------------------|------------|---------------------|------------|
| K(1)-O(9)#3         | 2.7461(15) | B(1)-O(2)           | 1.392(3)   |
| K(1)-O(4)#2         | 2.7525(15) | B(2)-O(9)#3         | 1.476(3)   |
| K(1)-O(4)           | 2.8347(15) | B(2)-O(4)           | 1.419(3)   |
| K(1)-O(10)          | 2.9795(15) | B(2)-O(7)#3         | 1.486(3)   |
| K(1)-O(10)#4        | 2.8794(16) | B(2)-O(3)           | 1.502(3)   |
| K(1)-O(6)#1         | 2.8282(15) | B(3)-O(4)           | 1.434(3)   |
| K(1)-O(7)#1         | 2.9660(16) | B(3)-O(10)#6        | 1.490(3)   |
| K(1)-O(8)           | 2.7006(15) | B(3)-O(6)           | 1.467(3)   |
| Na(1)-O(9)#6        | 2.3732(17) | B(3)-O(5)           | 1.505(3)   |
| Na(1)-O(3)#7        | 2.4402(18) | B(4)-O(6)           | 1.342(3)   |
| Na(1)-O(5)          | 2.3005(17) | B(4)-O(7)           | 1.359(3)   |
| Na(1)-O(2)#8        | 2.755(2)   | B(4)-O(8)           | 1.390(3)   |
| Na(1)-O(1)          | 2.3269(19) | B(5)-O(9)           | 1.355(3)   |
| Na(1)-O(1)#5        | 2.407(2)   | B(5)-O(10)          | 1.345(3)   |
| B(1)-O(3)           | 1.361(3)   | B(5)-O(8)           | 1.392(3)   |
| B(1)-O(5)           | 1.343(3)   |                     |            |
| O(9)#3-K(1)-O(4)#2  | 115.24(5)  | O(5)-Na(1)-O(9)#6   | 86.96(6)   |
| O(9)#3-K(1)-O(4)    | 50.47(4)   | O(5)-Na(1)-O(3)#7   | 139.74(7)  |
| O(9)#3-K(1)-O(10)#4 | 128.26(4)  | O(5)-Na(1)-O(2)#8   | 90.51(6)   |
| O(9)#3-K(1)-O(10)   | 135.74(5)  | O(5)-Na(1)-O(1)#5   | 97.80(7)   |
| O(9)#3-K(1)-O(6)#1  | 65.03(4)   | O(5)-Na(1)-O(1)     | 114.00(7)  |
| O(9)#3-K(1)-O(7)#1  | 98.57(5)   | O(1)-Na(1)-O(9)#6   | 102.60(7)  |
| O(4)#2-K(1)-O(4)    | 91.15(4)   | O(1)#5-Na(1)-O(3)#7 | 111.56(7)  |
| O(4)-K(1)-O(10)#4   | 138.98(4)  | O(1)-Na(1)-O(3)#7   | 94.92(7)   |
| O(4)#2-K(1)-O(10)   | 104.44(4)  | O(1)-Na(1)-O(2)#8   | 155.12(7)  |
| O(4)-K(1)-O(10)     | 112.76(4)  | O(1)#5-Na(1)-O(2)#8 | 85.07(6)   |
| O(4)#2-K(1)-O(10)#4 | 49.89(4)   | O(1)-Na(1)-O(1)#5   | 87.27(7)   |
| O(4)#2-K(1)-O(6)#1  | 122.56(5)  | O(3)-B(1)-O(2)      | 118.0(2)   |
| O(4)-K(1)-O(7)#1    | 133.29(5)  | O(5)-B(1)-O(3)      | 123.7(2)   |
| O(4)#2-K(1)-O(7)#1  | 135.54(5)  | O(5)-B(1)-O(2)      | 118.3(2)   |
| O(10)#4-K(1)-O(10)  | 92.01(4)   | O(9)#3-B(2)-O(7)#3  | 110.58(17) |
| O(10)#4-K(1)-O(7)#1 | 86.82(4)   | O(9)#3-B(2)-O(3)    | 104.72(16) |
| O(6)#1-K(1)-O(4)    | 115.35(4)  | O(4)-B(2)-O(9)#3    | 110.58(17) |
| O(6)#1-K(1)-O(10)#4 | 83.52(4)   | O(4)-B(2)-O(7)#3    | 113.35(18) |
| O(6)#1-K(1)-O(10)   | 109.32(4)  | O(4)-B(2)-O(3)      | 110.97(17) |
| O(6)#1-K(1)-O(7)#1  | 47.43(4)   | O(7)#3-B(2)-O(3)    | 106.20(17) |
| O(7)#1-K(1)-O(10)   | 61.91(4)   | O(4)-B(3)-O(10)#6   | 108.77(16) |
| O(8)-K(1)-O(9)#3    | 111.11(5)  | O(4)-B(3)-O(6)      | 112.32(18) |
| O(8)-K(1)-O(4)#2    | 90.19(5)   | O(4)-B(3)-O(5)      | 111.60(17) |
| O(8)-K(1)-O(4)      | 67.53(4)   | O(10)#6-B(3)-O(5)   | 108.14(17) |
| O(8)-K(1)-O(10)     | 47.98(4)   | O(6)-B(3)-O(10)#6   | 108.49(17) |
| O(8)-K(1)-O(10)#4   | 117.24(5)  | O(6)-B(3)-O(5)      | 107.41(16) |
| O(8)-K(1)-O(6)#1    | 146.19(5)  | O(6)-B(4)-O(7)      | 119.5(2)   |

---

|                     |           |                 |            |
|---------------------|-----------|-----------------|------------|
| O(8)-K(1)-O(7)#1    | 104.24(5) | O(6)-B(4)-O(8)  | 121.37(19) |
| O(9)#6-Na(1)-O(3)#7 | 58.66(5)  | O(7)-B(4)-O(8)  | 119.11(19) |
| O(9)#6-Na(1)-O(2)#8 | 82.01(6)  | O(9)-B(5)-O(8)  | 120.06(19) |
| O(9)#6-Na(1)-O(1)#5 | 166.28(7) | O(10)-B(5)-O(9) | 123.7(2)   |
| O(3)#7-Na(1)-O(2)#8 | 66.28(6)  | O(10)-B(5)-O(8) | 116.18(19) |

---

Symmetry transformations used to generate equivalent atoms:

#1  $x, y-1, z$

#2  $-x+1, -y+1, -z$

#3  $x-1, y, z$

#4  $-x+2, -y, -z$

#5  $-x+1, -y+2, -z+1$

#6  $x-1, y+1, z$

#7  $x, y+1, z$

#8  $-x, -y+2, -z+1$

**Table S6.** Selected bond lengths (Å) and angles (°) for II.

|                    |            |                    |           |
|--------------------|------------|--------------------|-----------|
| K(1)-O(1)#1        | 2.7381(17) | B(1)-O(2)          | 1.376(3)  |
| K(1)-O(1)          | 2.7381(17) | B(1)-O(3)#2        | 1.336(3)  |
| K(1)-O(2)#1        | 2.9331(17) | B(2)-O(1)#3        | 1.379(3)  |
| K(1)-O(2)          | 2.9331(17) | B(2)-O(2)#4        | 1.366(3)  |
| K(1)-O(3)#1        | 2.8448(18) | B(2)-O(4)          | 1.345(3)  |
| K(1)-O(3)          | 2.8449(18) | B(3)-O(3)          | 1.465(3)  |
| K(1)-O(5)          | 3.030(3)   | B(3)-O(3)#5        | 1.465(3)  |
| K(1)-O(5)#1        | 3.030(3)   | B(3)-O(4)          | 1.467(3)  |
| B(1)-O(1)          | 1.390(3)   | B(3)-O(4)#5        | 1.467(3)  |
| O(1)-K(1)-O(1)#1   | 170.12(8)  | O(3)#1-K(1)-O(2)   | 114.71(5) |
| O(1)#1-K(1)-O(2)   | 137.95(5)  | O(3)-K(1)-O(2)#1   | 114.71(5) |
| O(1)-K(1)-O(2)#1   | 137.95(5)  | O(3)#1-K(1)-O(3)   | 94.90(8)  |
| O(1)#1-K(1)-O(2)#1 | 47.73(5)   | O(3)#1-K(1)-O(5)   | 99.33(6)  |
| O(1)-K(1)-O(2)     | 47.73(5)   | O(3)-K(1)-O(5)#1   | 99.33(6)  |
| O(1)-K(1)-O(3)#1   | 67.17(5)   | O(3)-K(1)-O(5)     | 159.83(6) |
| O(1)-K(1)-O(3)     | 105.75(5)  | O(3)#1-K(1)-O(5)#1 | 159.83(6) |
| O(1)#1-K(1)-O(3)   | 67.17(5)   | O(5)-K(1)-O(5)#1   | 71.04(10) |
| O(1)#1-K(1)-O(3)#1 | 105.75(5)  | O(2)-B(1)-O(1)     | 112.6(2)  |
| O(1)#1-K(1)-O(5)   | 121.57(6)  | O(3)#2-B(1)-O(1)   | 122.0(2)  |
| O(1)#1-K(1)-O(5)#1 | 67.46(6)   | O(3)#2-B(1)-O(2)   | 125.4(2)  |
| O(1)-K(1)-O(5)#1   | 121.57(6)  | O(2)#4-B(2)-O(1)#3 | 121.6(2)  |
| O(1)-K(1)-O(5)     | 67.46(6)   | O(4)-B(2)-O(1)#3   | 120.6(2)  |
| O(2)-K(1)-O(2)#1   | 132.09(8)  | O(4)-B(2)-O(2)#4   | 117.7(2)  |
| O(2)-K(1)-O(5)     | 63.51(6)   | O(3)#5-B(3)-O(3)   | 109.1(3)  |
| O(2)-K(1)-O(5)#1   | 77.59(6)   | O(3)#5-B(3)-O(4)#5 | 111.57(9) |
| O(2)#1-K(1)-O(5)   | 77.59(6)   | O(3)-B(3)-O(4)     | 111.57(9) |
| O(2)#1-K(1)-O(5)#1 | 63.51(6)   | O(3)-B(3)-O(4)#5   | 108.47(9) |
| O(3)-K(1)-O(2)     | 97.53(5)   | O(3)#5-B(3)-O(4)   | 108.47(9) |
| O(3)#1-K(1)-O(2)#1 | 97.53(5)   | O(4)#5-B(3)-O(4)   | 107.6(3)  |

Symmetry transformations used to generate equivalent atoms:

#1  $x, -y+1/4, -z+1/4$

#2  $x+1/4, -y, z+1/4$

#3  $x-1/4, -y, z-1/4$

#4  $x-1/2, -y-1/4, -z+1/4$

#5  $-x+1/4, y, -z+1/4$



**Table S7.** Hydrogen bond lengths (Å) and angles (°) for **I** and **II**. D, hydrogen bond donor; A, hydrogen bond acceptor.

| Compounds | D-H...A                                                                                                        | $d_{(D-H)}$<br>(Å) | $d_{(H...A)}$<br>(Å) | $d_{(D-A)}$<br>(Å) | D-H...A<br>(°) |
|-----------|----------------------------------------------------------------------------------------------------------------|--------------------|----------------------|--------------------|----------------|
| <b>I</b>  | O(2)-H(1)···O(3)#2                                                                                             | 0.95               | 2.02                 | 2.852(2)           | 144.1          |
|           | O(1)-H(3)···O(2)#1                                                                                             | 0.94               | 2.04                 | 2.895(2)           | 150.1          |
|           | O(1)-H(2)···O(7)                                                                                               | 0.94               | 1.90                 | 2.831(2)           | 167.5          |
|           | Symmetry transformations used to generate equivalent atoms:<br>#1 $-x+1, -y+2, -z+1$ #2 $-x, -y+1, -z+1$       |                    |                      |                    |                |
| <b>II</b> | O(5)-H(1)···O(4)#1                                                                                             | 0.92               | 2.51                 | 3.260(3)           | 139.3          |
|           | O(5)-H(1)···O(4)#2                                                                                             | 0.92               | 2.05                 | 2.811(3)           | 139.7          |
|           | Symmetry transformations used to generate equivalent atoms:<br>#1 $-x+3/4, y+1/2, -z+1/4$ #2 $x+1/2, y+1/2, z$ |                    |                      |                    |                |

**Table S8.** Assignments of the absorption bands observed in the IR spectrum of I.

| Absorption bands (cm <sup>-1</sup> ) | Assignment                                                 |
|--------------------------------------|------------------------------------------------------------|
| 3473, 3397                           | asymmetric stretching of H-O                               |
| 1639                                 | the bending of group H-O-H                                 |
| 1356, 1262                           | asymmetric stretching of B-O in the [BO <sub>3</sub> ]     |
| 1136, 1089, 1043                     | asymmetric stretching of B-O in the [BO <sub>4</sub> ]     |
| 937, 883                             | symmetric stretching of B-O in the [BO <sub>3</sub> ]      |
| 828, 743                             | symmetric stretching of B-O in the [BO <sub>4</sub> ]      |
| 700, 624                             | out-of-plane bending modes of [BO <sub>3</sub> ]           |
| 565, 536                             | bending modes of [BO <sub>3</sub> ] and [BO <sub>4</sub> ] |

**Table S9.** Real-space atom-cutting analysis of the calculated birefringence of the title compounds. The cutting radii of Na, K, B, O, and H were set as 1.05, 1.50, 0.88, 1.12, and 0.32 Å, respectively.

| Compounds | Cut units                                                    | $\Delta n$ (at 1064 nm) |
|-----------|--------------------------------------------------------------|-------------------------|
| I         | None                                                         | 0.0610                  |
|           | Na                                                           | 0.0589                  |
|           | K                                                            | 0.0601                  |
|           | H <sub>2</sub> O                                             | 0.0592                  |
|           | [BO <sub>3</sub> ]+[BO <sub>2</sub> (OH)]+[BO <sub>4</sub> ] | 0.0158                  |
| II        | None                                                         | 0.0704                  |
|           | K                                                            | 0.0641                  |
|           | H <sub>2</sub> O                                             | 0.0619                  |
|           | [BO <sub>3</sub> ]+[BO <sub>4</sub> ]                        | 0.0128                  |

**Table S10.** The birefringence and the density of  $\pi$ -conjugated units of the title compounds.

| Compounds | Birefringence at 1064 nm (cal.) | $\pi$ -conjugated units                    | The density of $\pi$ -conjugated units ( $\text{\AA}^{-3}$ ) |
|-----------|---------------------------------|--------------------------------------------|--------------------------------------------------------------|
| I         | 0.061                           | [BO <sub>3</sub> ], [BO <sub>2</sub> (OH)] | 0.0145                                                       |
| II        | 0.070                           | [BO <sub>3</sub> ]                         | 0.0190                                                       |

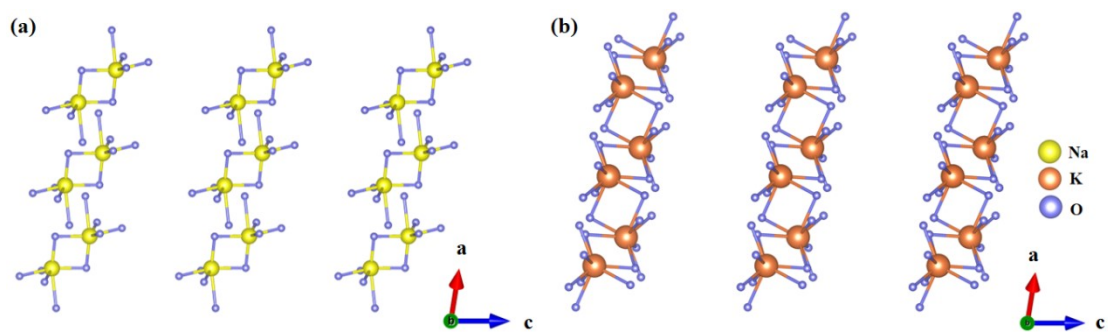

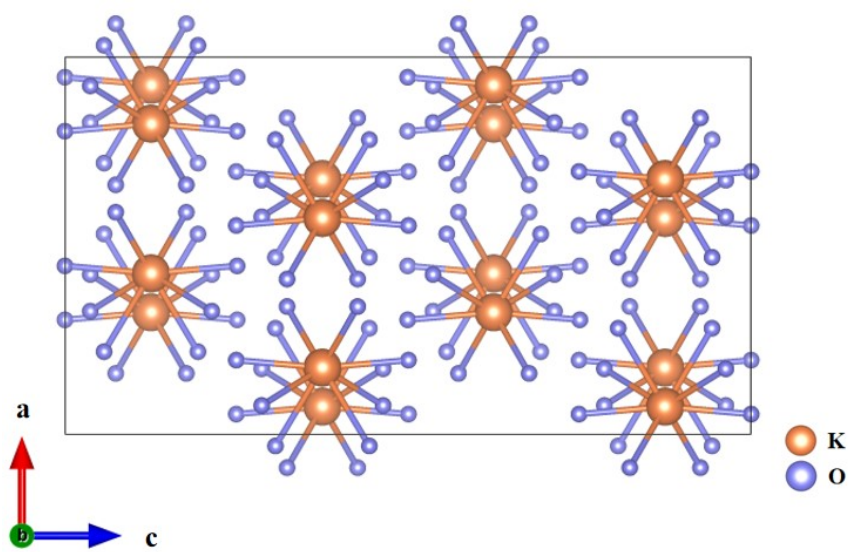

Figure S2. The isolated [KO<sub>8</sub>] polyhedra in II.

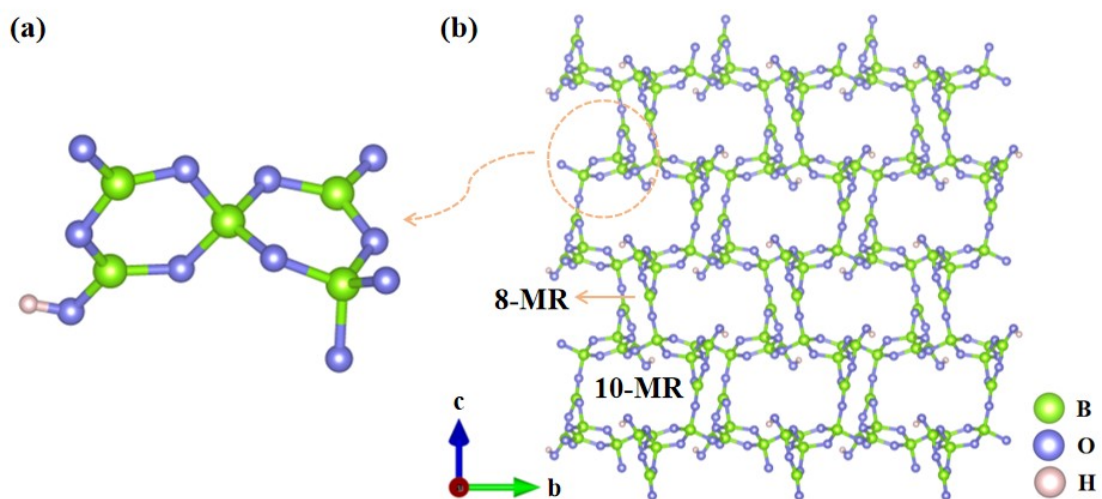

**Figure S3.** Crystal structure of  $\text{LiCsB}_5\text{O}_8(\text{OH})\cdot\text{H}_2\text{O}$ . (a)  $[\text{B}_5\text{O}_{10}(\text{OH})]$  FBB. (b) The  $^2[\text{B}_5\text{O}_8(\text{OH})]_\infty$  layer with 8- and 10- membered rings (MRs).

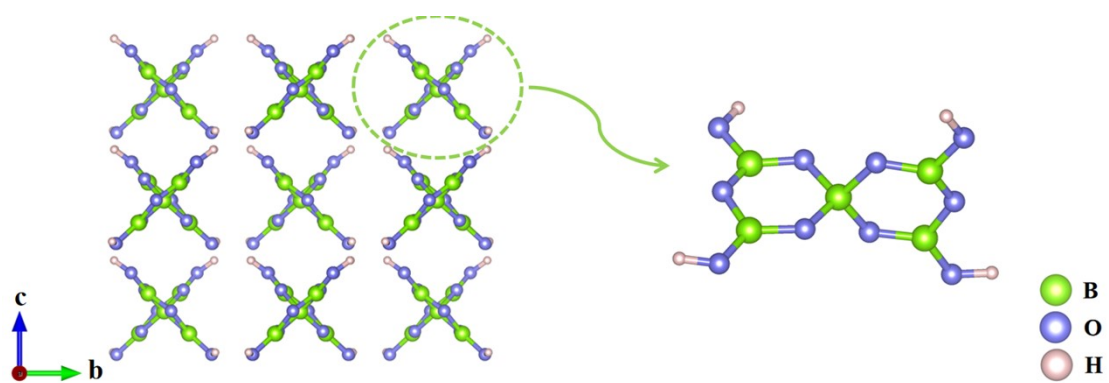

**Figure S4.** The isolated  $[\text{B}_5\text{O}_6(\text{OH})_4]$  FBBs in  $\text{KB}_5\text{O}_8 \cdot 4\text{H}_2\text{O}$ .



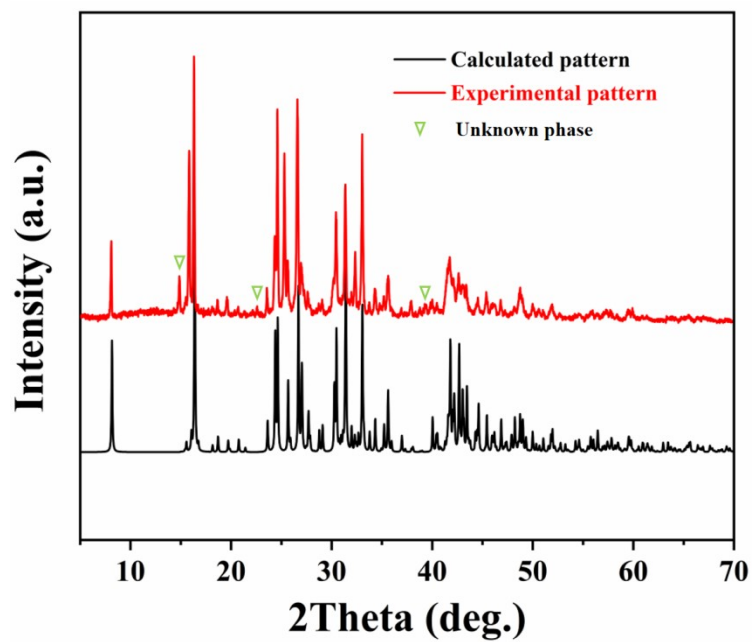

**Figure S5.** Calculated and experimental powder XRD patterns of I. The green inverted triangle symbols represent the impurity peaks of unknown phase.

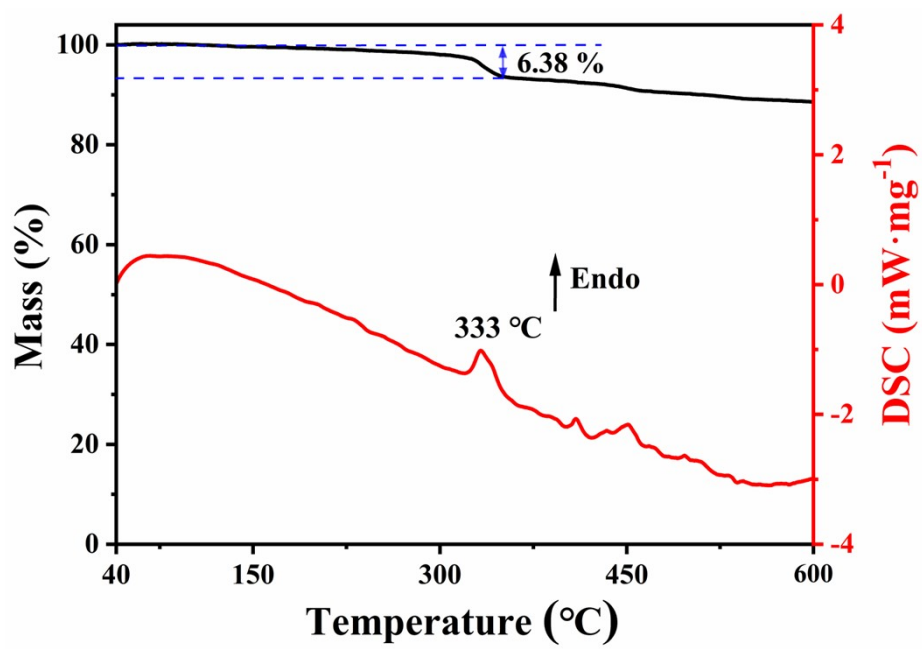

Figure S6. TG-DSC curves of I.

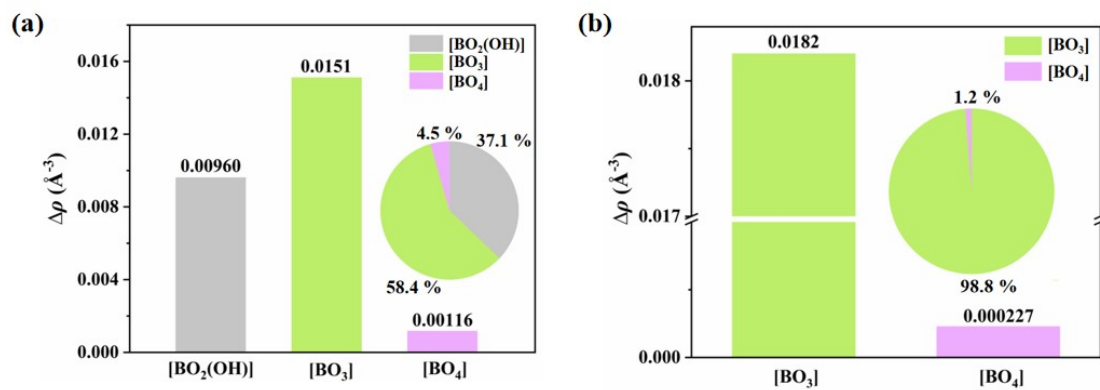

**Figure S7.** Bonding electron density difference ( $\Delta\rho$ ) of anionic groups calculated by adopting the REDA method for **I** (a) and **II** (b).
